# Supplementary material for: Evaluation of Antistigma Interventions With Sixth-Grade Students: A School-Based Field Experiment
Source: Atypon-hosted journal article supplement (doi:10.1176/appi.ps.201600052), 2016-11-15
Supplement: appi.ps.201600052.ds001.pdf [file appi.ps.201600052.ds001.pdf]

## **ONLINE SUPPLEMENT TABLE OF CONTENTS**

eTable 1. Knowledge and Attitudes about Mental Illness: Item Wording, Response Options, and Pre-Test Descriptive Statistics and Frequencies

eTable 2. Stigma Awareness and Action: Item Wording, Response Options, and Pre-Test Descriptive Statistics and Frequencies

eTable 3. Avoidance and Discomfort: Item Wording, Response Options, and Pre-Test Descriptive Statistics and Frequencies

eTable 4. Social Distance: Item Wording, Response Options, and Pre-Test Descriptive Statistics and Frequencies

eTable 5. Personal Help-Seeking: Item Wording, Response Options, and Pre-Test Descriptive Statistics and Frequencies

eTable 6. Vignettes

eTable 7. Beliefs about Vignette Subject and His/Her Condition: Item Wording, Response Options, and Pre-Test Descriptive Statistics and Frequencies

eTable 8. Vignette Social Distance: Item Wording, Response Options, and Pre-Test Descriptive Statistics and Frequencies

eTable 9. Vignette Help-Seeking Recommendations: Item Wording, Response Options, and Pre-Test Descriptive Statistics and Frequencies

eTable 10. Pre-Test Correlation Matrix of Dependent Measures

**eTABLE 1. Knowledge and Attitudes About Mental Illness<sup>1</sup>: Item Wording, Response Options, and Pre-Test Descriptive Statistics and Frequencies**

| Scale Mean 3.59, <sup>2</sup> Scale Standard Deviation .39 <sup>2</sup>                                                        | Strongly Agree (1) |    | Agree (2) |    | Neutral (3) |    | Disagree (4) |    | Strongly Disagree (5) |    | Item Mean <sup>3</sup> | Standard Deviation <sup>3</sup> |
|--------------------------------------------------------------------------------------------------------------------------------|--------------------|----|-----------|----|-------------|----|--------------|----|-----------------------|----|------------------------|---------------------------------|
|                                                                                                                                | N                  | %  | N         | %  | N           | %  | N            | %  | N                     | %  |                        |                                 |
| I would be comfortable meeting a person with a mental illness. <sup>R</sup>                                                    | 153                | 21 | 301       | 41 | 199         | 27 | 57           | 8  | 31                    | 4  | 2.34                   | 1.022                           |
| It would be embarrassing to have a mental illness.                                                                             | 57                 | 8  | 121       | 16 | 156         | 21 | 251          | 34 | 157                   | 21 | 3.44                   | 1.208                           |
| I would be frightened if a person with a mental illness approached me.                                                         | 33                 | 5  | 75        | 10 | 140         | 19 | 250          | 34 | 241                   | 33 | 3.80                   | 1.134                           |
| People with a mental illness are able to help others. <sup>R</sup>                                                             | 99                 | 14 | 278       | 38 | 239         | 33 | 92           | 13 | 26                    | 4  | 2.5                    | 0.991                           |
| A person with a mental illness is able to be a good friend. <sup>R</sup>                                                       | 301                | 41 | 291       | 40 | 110         | 15 | 22           | 3  | 12                    | 2  | 1.85                   | 0.896                           |
| It's okay to make jokes about a mental illness if the jokes are meant to be funny.                                             | 8                  | 1  | 28        | 4  | 50          | 7  | 159          | 22 | 493                   | 67 | 4.49                   | 0.863                           |
| Keeping people with a mental illness in the hospital makes the community a safer place.                                        | 45                 | 6  | 105       | 42 | 268         | 36 | 213          | 29 | 108                   | 15 | 3.32                   | 1.077                           |
| Students with a mental illness should not be allowed in regular classes.                                                       | 41                 | 6  | 113       | 15 | 178         | 24 | 258          | 35 | 148                   | 20 | 3.49                   | 1.137                           |
| Only people who are weak and overly sensitive let a mental illness affect them.                                                | 32                 | 4  | 107       | 4  | 187         | 25 | 317          | 43 | 100                   | 14 | 3.47                   | 1.032                           |
| If I had a mental illness, I would not tell any of my friends.                                                                 | 72                 | 10 | 107       | 4  | 162         | 22 | 260          | 35 | 145                   | 19 | 3.40                   | 1.223                           |
| The treatment of mental illnesses is just as important as the treatment of illnesses such as asthma and diabetes. <sup>R</sup> | 197                | 26 | 327       | 44 | 139         | 19 | 68           | 9  | 16                    | 2  | 2.17                   | 0.990                           |
| People with mental illnesses are hurt when others use slang words for their problem. <sup>R</sup>                              | 280                | 38 | 224       | 30 | 191         | 26 | 28           | 4  | 19                    | 3  | 2.03                   | 1.008                           |
| Parents are usually to blame for a child's mental illness.                                                                     | 11                 | 2  | 55        | 8  | 200         | 27 | 209          | 28 | 263                   | 36 | 3.89                   | 1.024                           |
| People with a mental illness tend to be violent and dangerous.                                                                 | 20                 | 3  | 67        | 9  | 277         | 38 | 228          | 31 | 146                   | 20 | 3.56                   | 0.994                           |
| People with a mental illness are more likely to lie than other people.                                                         | 14                 | 2  | 41        | 6  | 275         | 37 | 258          | 35 | 157                   | 21 | 3.68                   | 0.930                           |
| Most people with severe forms of mental illness do not get better, even with treatment.                                        | 18                 | 2  | 91        | 12 | 368         | 50 | 198          | 27 | 69                    | 9  | 3.28                   | 0.882                           |
| A mental illness is caused by something                                                                                        | 38                 | 5  | 134       | 18 | 482         | 65 | 72           | 10 | 14                    | 2  | 2.85                   | 0.734                           |

---

|                                                                                                                                     |     |    |     |    |     |    |     |    |    |    |      |       |  |
|-------------------------------------------------------------------------------------------------------------------------------------|-----|----|-----|----|-----|----|-----|----|----|----|------|-------|--|
| genetic or hereditary. <sup>R</sup>                                                                                                 |     |    |     |    |     |    |     |    |    |    |      |       |  |
| Giving medicine is a useful way to treat a mental illness. <sup>R</sup>                                                             | 58  | 8  | 284 | 38 | 296 | 36 | 110 | 15 | 22 | 3  | 2.67 | 0.923 |  |
| Mental retardation and mental illness are the same things.                                                                          | 18  | 2  | 89  | 12 | 330 | 45 | 216 | 29 | 89 | 12 | 3.36 | 0.926 |  |
| Psychological therapy (for example, talking to a psychologist or counselor) is a useful way to treat a mental illness. <sup>R</sup> | 103 | 14 | 340 | 46 | 206 | 28 | 77  | 10 | 18 | 2  | 2.42 | 0.935 |  |
| People who have had a mental illness include astronauts, presidents, and famous baseball players. <sup>R</sup>                      | 49  | 7  | 205 | 28 | 325 | 44 | 120 | 16 | 43 | 6  | 2.87 | 0.958 |  |

<sup>R</sup> Indicates that the item in question is reversed coded (1=5, 2=4, 3=3, 4=2, 5=1) for scale construction.

<sup>1</sup> The scale is scored by adding each person's score (after indicated reverse coding) on each question validly answered by that person (non-missing) and dividing by the number of items validly answered. If a respondent is missing on more than one third of items (8 or more) he/she is given a system missing value for the scale.

<sup>2</sup> Scale mean and standard deviation are from scale scored as described in footnote 1.

<sup>3</sup> Item means and standard deviations are from the variables before reverse coding.

---

**eTable 2. Stigma Awareness and Action<sup>1</sup>: Item Wording, Response Options, and Pre-Test Descriptive Statistics and Frequencies**

|                                                                                                                                      | Past Six Months |    |        |    | Past Two Weeks |    |        |    |
|--------------------------------------------------------------------------------------------------------------------------------------|-----------------|----|--------|----|----------------|----|--------|----|
|                                                                                                                                      | Yes (1)         |    | No (0) |    | Yes (1)        |    | No (0) |    |
|                                                                                                                                      | N               | %  | N      | %  | N              | %  | N      | %  |
| Scale Mean: 6 month = .46, 2 week = .17; 2 Scale Standard Deviation 6 month .26, 2 week = .20 <sup>2</sup>                           |                 |    |        |    |                |    |        |    |
| I heard people use slang terms about mental illness like “psycho,” “crazy” or “looney” to put people down.                           | 463             | 63 | 278    | 38 | 176            | 24 | 562    | 76 |
| I saw mental illness presented in a negative way on a TV program, movie, newspaper, magazine or online.                              | 342             | 46 | 399    | 54 | 134            | 18 | 603    | 82 |
| I told someone it is wrong to make fun of a person with mental illness.                                                              | 541             | 73 | 205    | 28 | 182            | 25 | 555    | 75 |
| I told someone I didn’t like the negative way that a mental illness was shown in a TV program, movie, newspaper, magazine or online. | 244             | 33 | 492    | 67 | 82             | 11 | 651    | 89 |
| Kids in my school have been left out activities because they had mental health problems                                              | 205             | 28 | 533    | 72 | 74             | 10 | 662    | 90 |
| I saw kids at my school making fun of someone who has a mental health problem.                                                       | 252             | 34 | 494    | 66 | 106            | 14 | 637    | 86 |
| I made friends with someone who has a mental health problem                                                                          | 345             | 47 | 397    | 54 | 89             | 12 | 648    | 88 |
| I saw kids in my school trying to help other kids with their mental health problems                                                  | 329             | 45 | 407    | 55 | 185            | 25 | 549    | 75 |

<sup>1</sup> The scale is scored by adding each person’s score on each question validly answered by that person (non-missing) and dividing by the number of items validly answered. If a respondent is missing on more than one third of items (3 or more) he/she is given a system missing value for the scale.

<sup>2</sup> Scale mean and standard deviation are from scale scored as described in footnote 1.

**eTable 3: Avoidance and Discomfort<sup>1</sup>: Item Wording, Response Options, and Pre-Test Descriptive Statistics and Frequencies**

|                                                                                | Past 6 Months |    |        |    | Past Two Weeks |    |        |    |
|--------------------------------------------------------------------------------|---------------|----|--------|----|----------------|----|--------|----|
|                                                                                | Yes (1)       |    | No (0) |    | Yes (1)        |    | No (0) |    |
|                                                                                | N             | %  | N      | %  | N              | %  | N      | %  |
| I avoided a person who seemed too nervous and uptight all the time.            | 110           | 16 | 597    | 84 | 40             | 6  | 670    | 94 |
| I avoided a kid in my school because of a mental health problem he or she had. | 47            | 7  | 658    | 93 | 22             | 3  | 686    | 97 |
| I felt uncomfortable around a kid in my class who has a mental health problem. | 71            | 10 | 623    | 90 | 25             | 4  | 672    | 96 |
| I avoided a kid who was depressed and never wanted to do anything fun.         | 119           | 17 | 589    | 83 | 45             | 6  | 666    | 94 |
| I avoided a person who said odd things and behaved in strange ways.            | 163           | 23 | 546    | 77 | 66             | 9  | 646    | 91 |
| I feel like I don't know what to say to a kid who has a mental health problem. | 203           | 29 | 500    | 71 | 75             | 11 | 628    | 89 |

<sup>1</sup> The scale is scored by adding each person's score on each question validly answered by that person (non-missing) and dividing by the number of items validly answered. If a respondent is missing more than one-third of the items (3 or more) he/she is assigned a system missing value for the scale.

<sup>2</sup> Scale mean and standard deviation are from scale scored as described in footnote 1.

**eTable 4. Social Distance<sup>1</sup>: Item Wording, Response Options, and Pre-Test Descriptive Statistics and Frequencies**

Overall Scale: Mean 2.15,<sup>2</sup> Standard Deviation .75,<sup>2</sup> Alpha .89  
 Less Acceptable Subscale: Mean 2.33, Standard Deviation .83,  
 Alpha .81  
 More Acceptable Subscale: Mean 1.96, Standard Deviation .75,  
 Alpha .72

Would it be OK with you to . . .

**Less Acceptable Subscale**

Invite someone with mental illness to your home

Sit next to someone with mental illness in class

Work on a class project with someone with mental illness

**More Acceptable Subscale**

Make friends with someone with mental illness

Have someone with mental illness as a neighbor

Eat lunch at school with someone who has a mental illness

|                                                           | Definitely Yes (1) |    | Probably Yes (2) |    | Probably No (3) |    | Definitely No (4) |    | Item Mean | Standard Deviation |
|-----------------------------------------------------------|--------------------|----|------------------|----|-----------------|----|-------------------|----|-----------|--------------------|
|                                                           | N                  | %  | N                | %  | N               | %  | N                 | %  |           |                    |
| Invite someone with mental illness to your home           | 139                | 19 | 282              | 38 | 238             | 32 | 86                | 12 | 2.36      | .92                |
| Sit next to someone with mental illness in class          | 192                | 26 | 253              | 34 | 186             | 25 | 114               | 15 | 2.30      | 1.02               |
| Work on a class project with someone with mental illness  | 172                | 23 | 255              | 34 | 207             | 28 | 107               | 14 | 2.34      | .99                |
| Make friends with someone with mental illness             | 349                | 47 | 268              | 36 | 93              | 13 | 34                | 5  | 1.75      | .85                |
| Have someone with mental illness as a neighbor            | 252                | 34 | 278              | 37 | 152             | 20 | 67                | 9  | 2.05      | .95                |
| Eat lunch at school with someone who has a mental illness | 7                  | 30 | 26               | 41 | 24              | 21 | 7                 | 9  | 2.09      | .92                |

<sup>1</sup> The scale is scored by adding each person's score on each question validly answered by that person (non-missing) and dividing by the number of items validly answered. If a respondent is missing on more than one third of items (3 or more for overall scale, 2 or more for subscales) he/she is given a system missing value for the scale.

<sup>2</sup> Scale mean and standard deviation are from scale scored as described in footnote 1.

**eTable 5. Personal help-seeking<sup>1</sup>: Item Wording, Response Options, and Pre-Test Descriptive Statistics and Frequencies**

Scale Mean .71<sup>2</sup>, Scale Standard Deviation .25<sup>2</sup>, Alpha .78

|                                                                                                       | Yes |    | No  |    |
|-------------------------------------------------------------------------------------------------------|-----|----|-----|----|
|                                                                                                       | N   | %  | N   | %  |
| I would talk to friends if I were having a mental health problem.                                     | 513 | 70 | 222 | 30 |
| I would talk to my parents if I were having a mental health problem.                                  | 649 | 89 | 83  | 11 |
| I would talk to my doctor if I were having a mental health problem.                                   | 648 | 88 | 85  | 2  |
| I would talk to a priest, minister, rabbi or other religious leader if I had a mental health problem. | 347 | 47 | 388 | 53 |
| I would talk to a school counselor if I had a mental health problem.                                  | 487 | 66 | 254 | 34 |
| I would talk to a therapist or counselor outside of school if I had a mental health problem.          | 452 | 62 | 281 | 38 |
| I would take medicine if I had a mental health problem.                                               | 562 | 76 | 176 | 24 |

<sup>1</sup> The scale is scored by adding each person's score on each question validly answered by that person (non-missing) and dividing by the number of items validly answered. If a respondent is missing on more than one third of items (3 or more) he/she is given a system missing value for the scale.

<sup>2</sup> Scale mean and standard deviation are from scale scored as described in footnote 1.

## **eTable 6. Vignettes**

### **Julia (meeting DSM IV criteria for bipolar disorder)**

Julia is a 13-year old student in your school. She has always made good grades, had a lot of friends, and played on the volleyball team. In the last three weeks, her behavior has changed. One minute she seems overly happy and the next minute seems angry and irritable. Sometimes Julia talks really fast about a lot of different things and no one else gets a chance to speak. Her behavior is very disruptive in class. She begins talking to the entire class about things not related to the class material while the teacher is talking. Julia has not been able to sleep more than two hours a night for several days, but does not feel tired. Last week she stole her parents' car and went for a ride even though she is not old enough to drive.

### **David (meeting DSM IV criteria for social anxiety disorder)**

David is a 13-year old student in your school. David refuses to attend any events such as dances or parties because he is scared he will do or say something embarrassing. When teachers ask him questions in front of the class, he feels his face get hot. He will not answer the teacher's question because he is afraid he will give the wrong answer. David even misses school of days he is supposed to speak in front of the class and will accept an F for the assignment. He does not feel he is as good as the other students.



**eTable 7. Beliefs About Vignette Subject and His/Her Condition: Item Wording, Response Options, and Pre-Test Descriptive Statistics and Frequencies<sup>1</sup>**

|                                                             | Not At All Likely (1)                                        |     | Not Very Likely (2) |     | Somewhat Likely (3) |    | Very Likely (4) |    | Item Mean | Standard Deviation |
|-------------------------------------------------------------|--------------------------------------------------------------|-----|---------------------|-----|---------------------|----|-----------------|----|-----------|--------------------|
|                                                             | N                                                            | %   | N                   | %   | N                   | %  | N               | %  |           |                    |
|                                                             | Julia is in this situation because she is just a bad person. | 359 | 49                  | 284 | 38                  | 73 | 10              | 24 |           |                    |
| Julia is experiencing a mental illness.                     | 14                                                           | 2   | 75                  | 10  | 359                 | 50 | 276             | 38 | 3.24      | 1.02               |
| Julia's situation will improve with treatment.              | 21                                                           | 3   | 131                 | 18  | 427                 | 59 | 146             | 20 | 2.96      | .99                |
| David is in this situation because he is just a bad person. | 360                                                          | 49  | 301                 | 41  | 45                  | 6  | 27              | 4  | 1.64      | .85                |
| David is experiencing a mental illness.                     | 82                                                           | 11  | 235                 | 33  | 289                 | 40 | 117             | 16 | 2.61      | .92                |
| David's situation will improve with treatment.              | 49                                                           | 7   | 172                 | 24  | 370                 | 51 | 141             | 19 | 2.82      | .92                |

<sup>1</sup> Analyzed as individual items, not a multi-item scale.

**eTable 8. Social Distance from Vignette Characters<sup>1</sup>: Item Wording, Response Options, and Pre-Test Descriptive Statistics and Frequencies**

|                                                                                       | Definitely Yes (1) |    | Probably Yes (2) |                  | Probably No (3) |    | Definitely No (4) |    | Item Mean | Standard Deviation |
|---------------------------------------------------------------------------------------|--------------------|----|------------------|------------------|-----------------|----|-------------------|----|-----------|--------------------|
|                                                                                       | N                  | %  | N                | %                | N               | %  | N                 | %  |           |                    |
| Scale Mean 2.10, <sup>2</sup> Scale Standard Deviation .72, <sup>2</sup><br>Alpha .92 |                    |    |                  |                  |                 |    |                   |    |           |                    |
| <b>Would it be OK with you to . . .</b>                                               |                    |    |                  |                  |                 |    |                   |    |           |                    |
| live next door to Julia?                                                              | 148                | 21 | 284              | 40               | 186             | 26 | 97                | 14 | 2.32      | .952               |
| spend an afternoon or evening hanging out with Julia?                                 | 131                | 19 | 265              | 34               | 229             | 32 | 85                | 12 | 2.38      | .919               |
| make friends with Julia?                                                              | 212                | 29 | 310              | 5 <sup>5</sup>   | 143             | 20 | 56                | 8  | 2.06      | .895               |
| work closely with Julia on a class assignment?                                        | 151                | 21 | 238              | 33 <sup>33</sup> | 238             | 33 | 88                | 12 | 2.37      | .950               |
| live next door to David?                                                              | 300                | 42 | 299              | 42               | 75              | 11 | 39                | 6  | 1.79      | .839               |
| spend an afternoon or evening hanging out with David?                                 | 246                | 35 | 291              | 41               | 133             | 19 | 40                | 6  | 1.95      | .871               |
| make friends with David?                                                              | 318                | 45 | 296              | 42               | 61              | 9  | 37                | 5  | 1.74      | .822               |
| work closely with David on a class assignment?                                        | 221                | 31 | 251              | 35               | 180             | 25 | 58                | 8  | 2.11      | .939               |

<sup>1</sup> The scale is scored by adding each person's score on each question validly answered by that person (non-missing) and dividing by the number of items validly answered. If a respondent is missing on more than one third of items (3 or more) he/she is given a system missing value for the scale.

<sup>2</sup> Scale mean and standard deviation are from scale scored as described in footnote 1.

**eTable 9. Vignette Help-Seeking Recommendations<sup>1</sup>: Item Wording, Response Options, and Pre-Test Descriptive Statistics and Frequencies**

Scale Mean: .78;<sup>2</sup> Scale Standard Deviation .21;<sup>2</sup> Alpha =.75.

|                                                                                | Yes<br>(1) |    | No<br>(0) |    |
|--------------------------------------------------------------------------------|------------|----|-----------|----|
|                                                                                | N          | %  | N         | %  |
| <b>Should Julia.....</b>                                                       |            |    |           |    |
| talk to friends or family about her problem?                                   | 704        | 95 | 34        | 5  |
| talk to a doctor about her problem?                                            | 677        | 92 | 56        | 8  |
| talk to a priest, minister, rabbi or other religious leader about her problem? | 483        | 66 | 246       | 34 |
| take medicine for her problem?                                                 | 559        | 76 | 179       | 24 |
| talk to a school counselor about her problem?                                  | 628        | 86 | 105       | 14 |
| talk to a therapist or a counselor outside of school about her problem?        | 595        | 81 | 139       | 19 |
| <b>Should David....</b>                                                        |            |    |           |    |
| talk to friends or family about his problem?                                   | 674        | 92 | 56        | 8  |
| talk to a doctor about his problem?                                            | 538        | 74 | 192       | 26 |
| talk to a priest, minister, rabbi or other religious leader about his problem? | 412        | 56 | 318       | 44 |
| take medicine for his problem?                                                 | 381        | 52 | 351       | 48 |
| talk to a school counselor about his problem?                                  | 622        | 86 | 103       | 14 |
| talk to a therapist or a counselor outside of school about his problem?        | 542        | 74 | 189       | 26 |

<sup>1</sup> The scale is scored by adding each person's score on each question validly answered by that person (non-missing) and dividing by the number of items validly answered. If a respondent is missing on more than one third of items (5 or more) he/she is given a system missing value for the scale.

<sup>2</sup> Scale mean and standard deviation are from scale scored as described in footnote 1.

**eTable 10. Pre-Test Correlations Between Dependent Measures (Pearson correlation coefficient, 2-tailed significance level, N)**

|                                            | 1       | 2       | 3      | 4       | 5       | 6       | 7       | 8      | 9      | 10      | 11    | 12     | 13     | 14   |
|--------------------------------------------|---------|---------|--------|---------|---------|---------|---------|--------|--------|---------|-------|--------|--------|------|
| 1 Knowledge/<br>Attitudes                  |         |         |        |         |         |         |         |        |        |         |       |        |        |      |
| 2 Awareness/<br>Action                     | .21***  |         |        |         |         |         |         |        |        |         |       |        |        |      |
| 3 Avoidance/<br>Discomfort                 | -.17*** | .23***  |        |         |         |         |         |        |        |         |       |        |        |      |
| 4 Social Distance<br>(Overall)             | -.61*** | -.25*** | .15*** |         |         |         |         |        |        |         |       |        |        |      |
| 5 Social Distance<br>(Less Acceptable)     | -.56*** | -.23*** | .14*** | .95***  |         |         |         |        |        |         |       |        |        |      |
| 6 Social Distance<br>(More Acceptable)     | -.60*** | -.24*** | .15*** | .95***  | .81***  |         |         |        |        |         |       |        |        |      |
| 7 Personal<br>Willingness to<br>Seek Help  | .28***  | .09*    | -.06   | -.26*** | -.24*** | -.26*** |         |        |        |         |       |        |        |      |
| 8 Julia is a Bad<br>Person                 | -.34*** | -.05    | .09*   | .28***  | .24***  | .29***  | -.12**  |        |        |         |       |        |        |      |
| 9 Julia Has Mental<br>Illness              | .07*    | .04     | .05    | -.07    | -.06    | -.08*   | .05     | -.12** |        |         |       |        |        |      |
| 10 Julia Will<br>Improve with<br>Treatment | .14***  | .03     | -.01   | -.13**  | -.12**  | -.12**  | .18***  | -.06   | .15*** |         |       |        |        |      |
| 11 David is a Bad<br>Person                | -.27*** | .00     | .13**  | .18***  | .15***  | .19***  | -.18*** | .34*** | -.09*  | -.16*** |       |        |        |      |
| 12 David Has<br>Mental Illness             | .02     | .02     | .00    | -.01    | .01     | -.02    | .06     | .01    | .28*** | .07     | .10** |        |        |      |
| 13 David Will<br>Improve with<br>Treatment | .07     | .05     | .02    | -.05    | -.04    | -.05    | .07*    | .01    | .13*** | .33***  | .03   | .30*** |        |      |
| 14 Julia/David<br>Should Seek Help         | .12**   | -.01    | -.01   | -.07    | -.05    | -.08*   | .40***  | -.06   | .19*** | .22***  | -.08* | .31*** | .29*** |      |
| 15 Social Distance<br>From Julia/David     | -.44**  | -.26    | .14**  | .61**   | .57**   | .59**   | -.25**  | .27**  | -.04   | -.17**  | .26** | .04    | -.05   | -.06 |
